# Supplementary material for: Performance of selenate removal by biochar embedded nano zero-valent iron and the biological toxicity to Escherichia coli
Source: Royal Society of Chemistry journal article supplement (doi:10.1039/c9ra04535j), 2019-01-01
Supplement: c9ra04535j1.pdf [file c9ra04535j1.pdf]

## Supplementary Data

### **Performance of selenate removal by biochar embedded nano zero-valent iron and the biological toxicity to *Escherichia coli***

Liping Liang<sup>a,b\*</sup>, Yuanyuan Xue<sup>a</sup>, Gangliang Tian<sup>b</sup>, Qiaole Mao<sup>b</sup>, Zixuan Lou<sup>b</sup>, Qian Wu<sup>a</sup>, Qian Wang<sup>a</sup>, Juanshan Du<sup>c</sup>, and Xu Meng<sup>d\*</sup>

- a. School of Civil Engineering, Shaoxing University, Shaoxing 312000, P. R. China
- b. College of Life Science, Shaoxing University, Shaoxing 312000, P. R. China
- c. State Key Laboratory of Urban Water Resource and Environment, Harbin Institute of Technology, Harbin 150090, PR China.
- d. College of Textile and Garment, Shaoxing University, Shaoxing 312000, P. R. China

\*Corresponding author contact information:

Liping Liang, email: Liangliping0702@163.com; Tel.: +86-575-88345007.

Xu Meng, email: mengxu0@163.com; Tel.: +86-575-88341506.

Number of pages (including this page): 4

Number of Figures: 2

Number of Tables: 1

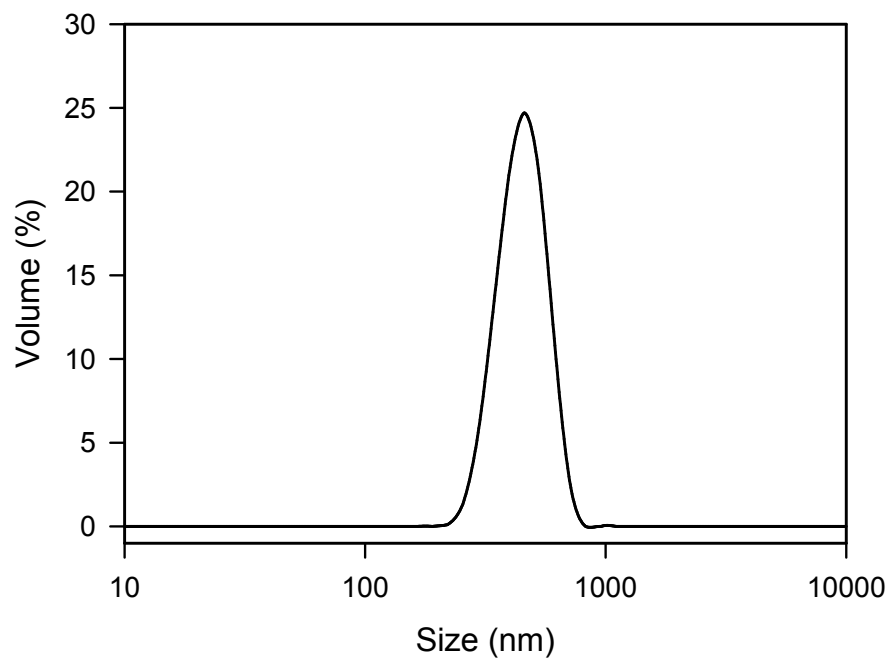

Fig. S1 Particle size distribution of the biochar sample

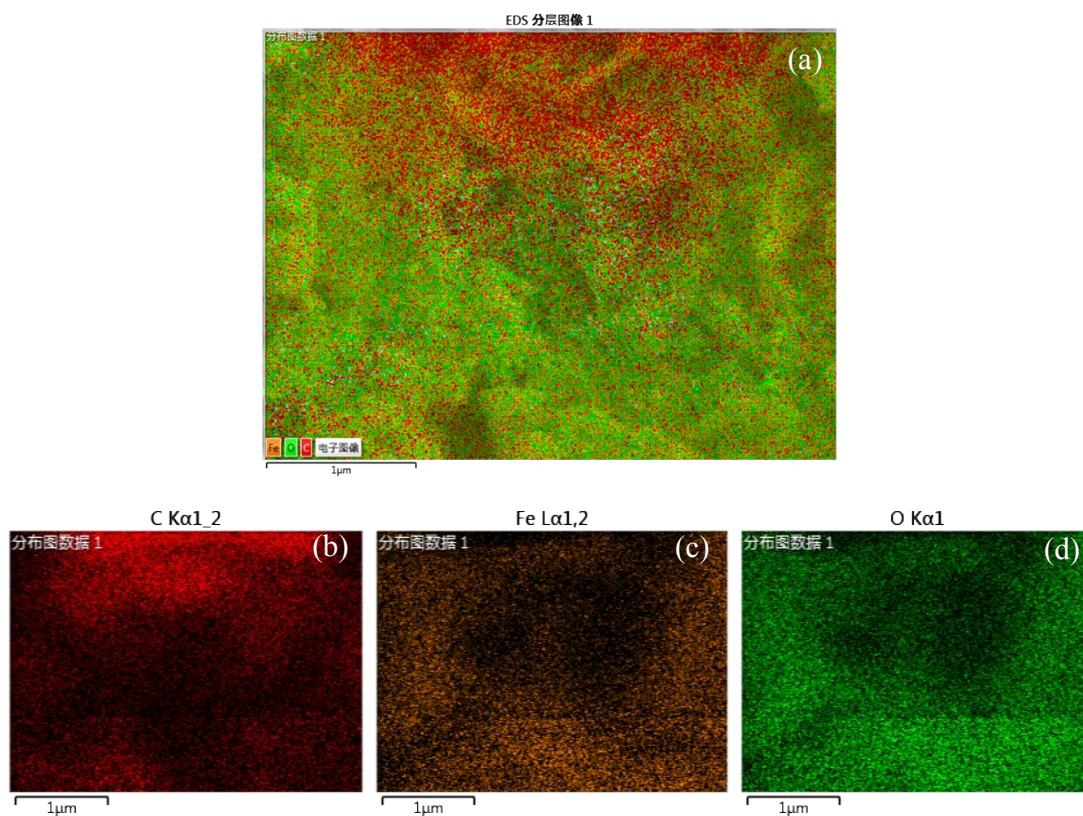

Fig. S2 The EDS elemental mapping of (a) all elements, (b) C, (c) Fe, and (d) O elements of the BC-nZVI sample

Table S1 Organic elemental analysis of biochar

| N(%)  | C(%)   | H(%)  | S(%)  | O(%) |
|-------|--------|-------|-------|------|
| 1.091 | 67.324 | 3.022 | 0.059 | /    |
